## THE ROLE OF V-ATPase IN NEURONAL AND ENDOCRINE SYSTEMS

By YOSHINORI MORIYAMA\*, MASATOMO MAEDA AND MASAMITSU FUTAI

*Department of Organic Chemistry and Biochemistry, Institute of Scientific and Industrial Research, Osaka University, Ibaraki Osaka 567, Japan*

### Summary

Synaptic vesicles have important roles in the neural transmission at nerve terminals: the storage and the controlled exocytosis of neurotransmitters. At least two different factors are responsible for the concentration process: the vacuolar-type  $H^+$ -ATPase (V-ATPase), establishing an electrochemical gradient of protons, and specific transport systems for transmitters. We will discuss our recent progress on the energy-transducing systems in synaptic vesicles: (1) structural aspects of V-ATPase; (2) energy coupling of transport of transmitters; (3) reconstitution of transporters; (4) effects of neurotoxins and neuron blocking agents; (5) function of synaptic-vesicle-like microvesicles from endocrine tissues.

### Introduction

Synaptic vesicles play an important role in neuronal transmission in nerve termini. They accumulate high concentrations of neurotransmitters and, upon receiving the proper signal, secrete them by exocytosis. Similarly, secretory granules in endocrine cells accumulate biogenic amines and secrete them by exocytosis (Ueda, 1986; Johnson, 1988; Njus *et al.* 1987). We have been interested in the bioenergetics of the accumulation process, which is an initial step in neuronal transmission or biogenic amine secretion. Our results are consistent with a chemiosmotic energy coupling mechanism for the accumulation: a V-ATPase forms an electrochemical gradient of protons across vesicular membranes and transmitters are taken up through specific transporters coupled with this gradient (Fig. 1). Here, we discuss our recent results supporting this model.

### Structure of vacuolar-type $H^+$ -ATPase

V-ATPases purified from adrenal chromaffin granules (Moriyama and Nelson, 1987a) and brain clathrin-coated vesicles (Xie and Stone, 1986) have essentially the same subunit structures (115, 72, 57, 41, 39, 34, 33, 20 and  $16 \times 10^3 M_r$  subunits with a stoichiometry of 1, 3, 3, 1, 1, 1, 1, 1 and 5-6) (Arai *et al.* 1988). Cold treatment in the presence of MgATP and appropriate salts (e.g.  $0.1 \text{ mol l}^{-1} \text{ NaNO}_3$ ) caused rapid inactivation accompanied by release of a group of hydrophilic subunits (subunit A, B, C,

\*To whom correspondence should be addressed.

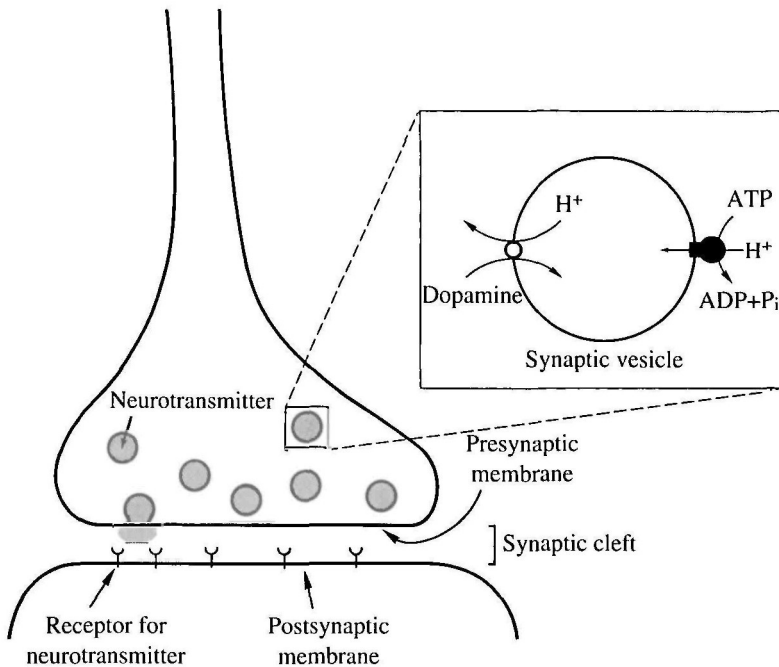

Fig. 1. Energy coupling of uptake of transmitter by synaptic vesicles.

*D* and *E* of  $72, 57, 41, 34$  and  $33 \times 10^3 M_r$ , respectively) but four polypeptides ( $115, 39, 20$  and  $16 \times 10^3 M_r$ ) remained in the membrane (Moriyama and Nelson, 1989a). Subunit *A* contains an ATP binding site (Moriyama and Nelson, 1987b) and is homologous to the subunit of  $F_1$ -ATPase (Zimniak *et al.* 1988). Subunit *c* ( $16 \times 10^3 M_r$ ) binds *N,N'*-dicyclohexylcarbodiimide (DCCD) and is homologous to the *c* subunit of the  $F_0$  portion of F-ATPase (Mandel *et al.* 1988; Sutton and Apps, 1981). These findings indicate that the enzyme is composed of two different sectors (catalytic and hydrophobic membrane sectors). All V-ATPases from plants and animals show similar properties and essentially the same subunit structures (Moriyama and Nelson, 1989b,c). This conclusion was confirmed by analyses of the primary structures of the subunits (for reviews, see Nelson, 1989; Forgac, 1989; Futai *et al.* 1990).

Immunoelectron microscopy, using proteoliposomes reconstituted with purified chromaffin granule V-ATPase, demonstrated the presence of particles of 10 nm diameter on the membrane: these particles could be removed by cold treatment and were recognized by antibodies against the hydrophilic sector of chromaffin granule ATPase (Moriyama *et al.* 1991c). Thus, this particle is the hydrophilic sector of V-ATPase and is similar to  $F_1$  of F-ATPase.

Using the immunoblotting technique Moriyama and Nelson (1990) and Cidon and Shira (1989) demonstrated that brain synaptic vesicles possess V-ATPase. The enzyme is a major constituent of the vesicles (approximately 20 % of the total membrane protein) (Moriyama and Futai, 1990a) (Fig. 2). This result also suggests a high density of the ATPase in the brain, as synaptic vesicles are abundant in the brain. In fact, the levels of

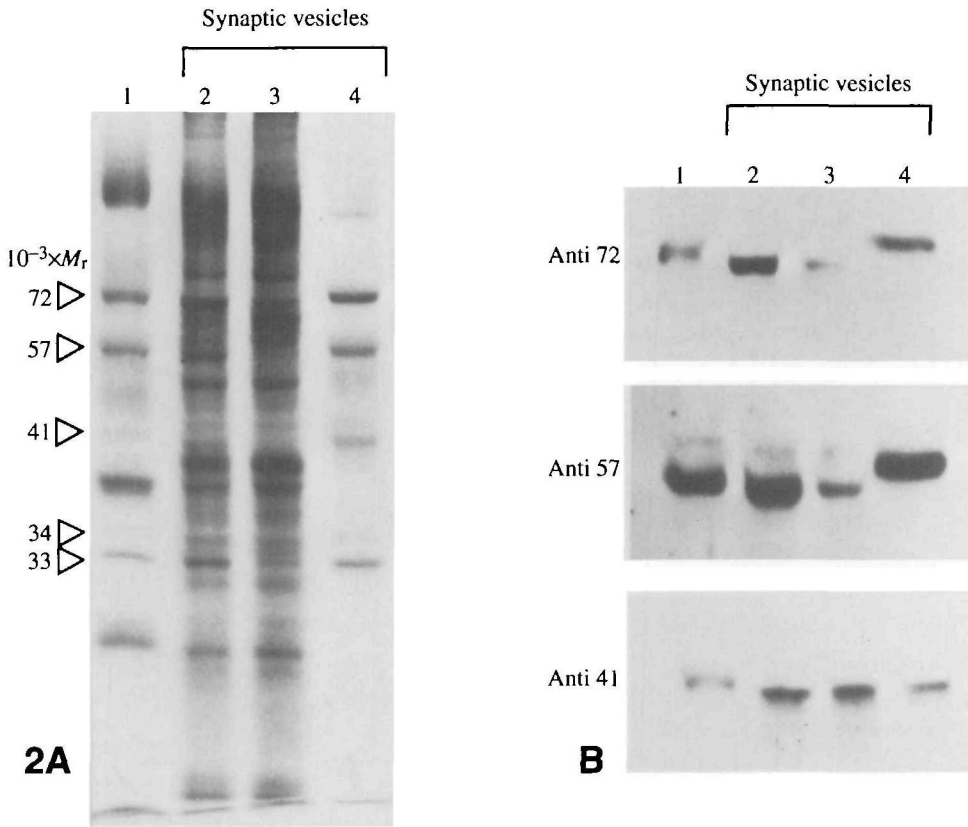

Fig. 2. Release of the peripheral portion of synaptic vesicle V-ATPase by alkaline treatment. Synaptic vesicles ( $1 \text{ mg ml}^{-1}$ ) were treated with sodium carbonate and hydrophilic sectors released from the membranes were obtained. See experimental details in Moriyama and Futai (1990a). (A) SDS-polyacrylamide gel electrophoresis. Lane 1, V-ATPase purified from chromaffin granules ( $5 \mu\text{g}$ ); lane 2, synaptic vesicles ( $20 \mu\text{g}$  protein); lane 3, depleted membranes after alkaline treatment ( $20 \mu\text{g}$ ); lane 4, supernatant (hydrophilic sector) after alkaline treatment ( $4 \mu\text{g}$ ). Proteins were stained with Coomassie Brilliant Blue. (B) Immunological identification of subunits of V-ATPase. Proteins in the gel (see A) were transferred onto a nitrocellulose sheet and their cross-reactivity with antibodies against subunits A, B and D of chromaffin granule V-ATPase was examined with  $^{125}\text{I}$ -labelled protein A. Autoradiograms are shown. The contents of lanes are the same as in A.

mRNAs encoding subunits of V-ATPase were higher in the brain than in other tissues (Nelson *et al.* 1990; Wang *et al.* 1988; Hirsch *et al.* 1988). Is the V-ATPase of synaptic vesicles structurally similar to those in other organelles, or are different isoforms expressed in different organelles? To answer this question, we cloned a cerebellar cDNA encoding a  $16 \times 10^3 M_r$  subunit, a major intrinsic membrane protein of V-ATPase (Hanada *et al.* 1991). The deduced amino acid sequence showed that this brain polypeptide (155 amino acids residues; relative molecular mass, 15 808) was highly hydrophobic and homologous to subunits from bovine adrenal medulla, the *Torpedo marmorata* electric

lobe, *Drosophila* and yeast. Glu-139, thought to be essential for proton transport, was also conserved as a potential DCCD binding site.

We then cloned four different  $16 \times 10^3 M_r$  genes including pseudogenes from a human genomic bank using the cDNA as a probe (Hasebe *et al.* 1992). One gene corresponded to the gene encoding the  $16 \times 10^3 M_r$  subunit expressed in HeLa cells and had a coding sequence separated by two introns. The second intron was located in the DNA segment coding for a loop region between the second and third transmembrane helices, suggesting that the  $16 \times 10^3 M_r$  subunit with four transmembrane helices had evolved by gene duplication. We are analyzing whether other genes are actually transcribed. The primary sequence deduced from the second clone had a termination codon behind the third transmembrane helix. Possible translation products from other clones had no putative acidic residues essential for proton transport. We do not yet have evidence for organelle-specific differences in V-ATPases. However, detailed studies on genes from different sources may eventually answer this question.

### **Uptake of neurotransmitter into synaptic vesicles**

#### *Energy coupling*

Synaptic vesicles contain transporters for monoamines, acetylcholine, anionic glutamate and  $\gamma$ -aminobutyrate (GABA) as well as zwitterionic glycine (Ueda, 1986; Johnson, 1988; Njus *et al.* 1987; Hell *et al.* 1988; Kish *et al.* 1989). A monoamine transporter that is sensitive to reserpine and tetrabenzine is also present in various secretory granules. We concluded that V-ATPase couples the uptakes of these transmitters to ATP hydrolysis, because selective inhibition of the ATPase by bafilomycin A<sub>1</sub> and cold treatment or treatment with sodium carbonate diminished the uptakes (Moriyama and Futai, 1990a).

The electrochemical gradient of protons established by V-ATPase consists of a proton gradient and a membrane potential. The uptakes of monoamines and GABA are sensitive to nigericin plus K<sup>+</sup> or ammonium (a dissipator of the proton gradient) but are not affected by valinomycin plus K<sup>+</sup> (a dissipator of the membrane potential), indicating that these uptakes are coupled to a proton gradient. In contrast, glutamate uptake is coupled to a membrane potential (inside positive), because it is sensitive to valinomycin plus K<sup>+</sup> or a high concentration of Cl<sup>-</sup> but insensitive to nigericin plus K<sup>+</sup> and slightly accelerated by ammonium (Ueda, 1986; Moriyama *et al.* 1990).

### **Solubilization and reconstitution of the neurotransmitter transporter with F-ATPase**

Purification of the transporter from synaptic vesicles has been hampered by the difficulty of measuring its activity after its solubilization from the membranes. We are able to measure the activity of transporters by following uptake into liposomes upon application of an artificial driving force, but this procedure was not suitable as a routine assay. However, the transport activity was assayed easily by the addition of ATP after the solubilized transporters had been incorporated into liposomes along with F-ATPase. We established a rapid and efficient purification procedure for F-ATPase from overproducing

*Escherichia coli* cells (Moriyama *et al.* 1991b). The monoamine transporter was solubilized from chromaffin membranes after removal of V-ATPase by cold treatment. It was mixed with purified  $F_1F_0$  and azolectine liposomes, freeze-thawed and diluted with an appropriate buffer. The resulting proteoliposomes exhibited reserpine-sensitive, ATP-dependent monoamine uptake, which was sensitive to sodium azide (an inhibitor of F-ATPase) but resistant to bafilomycin  $A_1$  and *N*-ethylmaleimide (inhibitors of V-ATPase), indicating that the driving force for the uptake was supplied by the F-ATPase. The glutamate transporter could be reconstituted by a similar method (H.-L. Tsi, Y. Moriyama and M. Futai, unpublished observation). It should be noted that limited numbers of proteins derived from chromaffin vesicles were incorporated into liposomes, suggesting that the transporters were partially purified. Thus, the reconstitution systems using  $F_1F_0$  will be useful for identifying and purifying the transporters.

### **Effects of neuron blocking reagents and neurotoxin on the energy transducing systems in secretory vesicles**

#### *Effects of neuron blocking reagents*

Neuronal transmission is perturbed by reagents that abolish the accumulation of transmitters in vesicles. These reagents can be classified as inhibitors of various steps in the formation and utilization of the electrochemical gradient in the vesicles. One class of such compounds interacts directly with the transporters and inhibits their activities. Reserpine, an example of a specific inhibitor of vesicular transport, binds to the monoamine transporter from inside the vesicles and blocks adrenergic neurons (Shore and Norn, 1971). Another class of inhibitors dissipates the electrochemical gradient of protons (e.g. CCCP and ammonium), resulting in indirect inhibition of the uptake (Johnson, 1988). We found that some neuron blocking reagents show both types of inhibition.

Vesamicol (AH5183) and bromocryptine were proposed as inhibitors of the acetylcholine transporter (Marshall and Parsons, 1987) and  $\alpha$ -blocker (Fuxe *et al.* 1978), respectively. However, they also inhibited dopamine transport in synaptic vesicles and chromaffin granules (Moriyama *et al.* 1991c). The inhibition was not due to the direct interaction of these compounds with the monoamine transporter but to dissipation of the electrochemical gradient across secretory vesicles by their uncoupling effect. Thus, treatment of vesicles with these reagents caused non-specific inhibition of transmitter uptake by the synaptic vesicles without affecting the V-ATPase activity. The uncoupling may be due to protonation/deprotonation of the compounds as these compounds are hydrophobic tertiary amines. Various kinds of neuron blocking agents and local anesthetics are hydrophobic amines. Some neuron blockers and local anesthetics, including chlorpromazine, strongly inhibit the formation of a proton gradient in secretory vesicles, thereby blocking the accumulation of monoamines (Y. Moriyama, R. Suzuki, H.-L. Tsui and M. Futai, unpublished observation) (Fig. 3). Thus, all of these compounds can be expected to show uncoupling effects similar to those of vesamicol and bromocryptine and their dissipation of the proton gradient may, at least in part, be the reason for the neuron blocking action.

*Uptake of 4-methylphenylpyridinium (MPP<sup>+</sup>), a neurotoxin causing Parkinsonism, into synaptic vesicles*

False transmitters, another type of reagent interacting with the transporters, are recognized as substrates by the transporters and accumulate in the vesicles. MPP<sup>+</sup>, a highly bioactive metabolic product of MPTP, is a neurotoxin that causes degradation of dopaminergic neurons in man and experimental animals (artificial Parkinsonism) (Langston *et al.* 1983; Heikkila *et al.* 1984). We found that this neurotoxin is the substrate of the vesicular monoamine transporter.

Upon addition of ATP, MPP<sup>+</sup> was actively accumulated in chromaffin membrane vesicles and synaptic vesicles, leading to a concentration gradient of about 100-fold (Y. Moriyama, K. Amakatsu and M. Futai, in preparation). The uptake was sensitive to bafilomycin A<sub>1</sub> and reserpine, indicating that it was mediated by V-ATPase and the monoamine transporter. These results suggest that MPP<sup>+</sup> accumulates in these organelles *in vivo* by this mechanism. Furthermore, addition of MPP<sup>+</sup> inhibited dopamine uptake but did not affect the uptake of glutamate or GABA. These results are consistent with the hypothesis that MPP<sup>+</sup> is toxic to dopaminergic neurons but has little effect on other neurons. The compartmentation of MPP<sup>+</sup> may also be important for understanding the mechanism of long-term toxicity of the compound and will provide one molecular basis for development of a Parkinsonian syndrome.

### Conclusions

In this article, we have described the structure and function of V-ATPase in synaptic vesicles. The electrochemical gradient of protons established by the ATPase is used as a

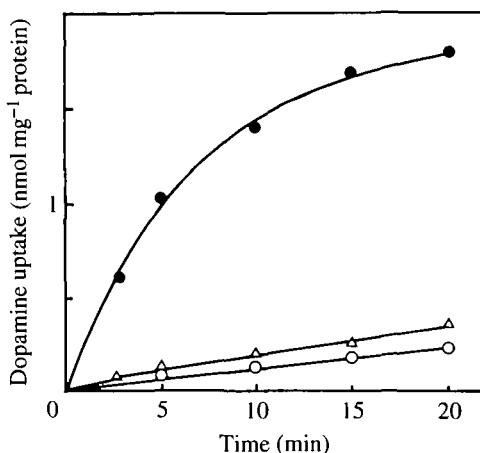

Fig. 3. Tetracaine inhibits the ATP-dependent uptake of dopamine by chromaffin granules. Dopamine uptake by chromaffin vesicles was measured in the presence (●, △) or absence (○) of ATP. (△), tetracaine (0.25 mmol l<sup>-1</sup>) was also included. See experimental details in Moriyama *et al.* (1991a). Under similar conditions, tetracaine inhibited the ATP-dependent formation of a proton gradient without affecting the ATPase activity and the formation of a membrane potential (inside positive).

driving force for the concentration of transmitters inside the organelles. Various drugs (e.g. neuron blockers, local anesthetics) or toxins (e.g. MPP<sup>+</sup>) may affect the uptake into the synaptic vesicles and so perturb neuronal transmission. Thus, V-ATPase has key physiological and pharmacological roles in the nervous and endocrine systems.

This work was supported by grants from the Ministry of Education, Science and Culture of Japan, the Human Frontier Science Program and Naito Foundation.

## References

- ARAI, H., TERRS, G., PINK, S. AND FORGAC, M. (1988). Topography and subunit stoichiometry of the coated vesicle proton pump. *J. biol. Chem.* **263**, 8792–8802.
- CIDON, S. AND SHIRA, T. S. (1989). Characterization of a H<sup>+</sup>-ATPase in rat brain synaptic vesicles: coupling to L-glutamate transport. *J. biol. Chem.* **264**, 8281–8288.
- FORGAC, M. (1989). Structure and function of vacuolar class of ATP-driven proton pumps. *Physiol. Rev.* **69**, 765–796.
- FUTAI, M., HANADA, H., MORIYAMA, Y. AND MAEDA, M. (1991). Proton translocating ATPase (F<sub>0</sub>F<sub>1</sub>): understanding its molecular structure and function. In *New Era of Bioenergetics* (ed. Y. Mukohota), pp. 73–108. Tokyo: Academic Press.
- FUXE, K., FREDHOLM, B. B., OGREN, S. O., AGNATI, L. F., HOKFELT, T. AND GUSTAFSSON, J. (1978). Ergot drugs and central monoaminergic mechanism: a histochemical, biochemical and behavioral analysis. *Fedn Proc. Fedn Am. Socs exp. Biol.* **37**, 2181–2191.
- HANADA, H., HASEBE, M., MORIYAMA, Y., MAEDA, M. AND FUTAI, M. (1991). Molecular cloning of cDNA encoding the 16 kDa subunit of vacuolar H<sup>+</sup>-ATPase from mouse cerebellum. *Biochem. biophys. Res. Commun.* **176**, 1062–1067.
- HASEBE, M., HANADA, H., MORIYAMA, Y., MAEDA, M. AND FUTAI, M. (1992). Vacuolar type H<sup>+</sup>-ATPase genes: presence of four genes including pseudogenes for the 16-kDa proteolipid subunit in the human genome. *Biochem. biophys. Res. Commun.* **183**, 856–863.
- HEIKKILA, R. E., HESS, A. AND DUVOSIN, R. C. (1984). Dopaminergic neurotoxicity of 1-methyl-4-phenyl-1,2,5,6-tetrahydropyridine in mice. *Science* **224**, 1451–1453.
- HELL, J. W., MAYCOX, P. R., STADLER, H. AND JAHN, R. (1988). Uptake of GABA by rat brain synaptic vesicles isolated by a new procedure. *EMBO J.* **7**, 3023–3029.
- HIRSCH, S., STRAUS, A., MASOOD, K., LEE, S., SUKHATME, V. AND GLUCK, S. (1988). Isolation and sequence of a cDNA clone encoding the 31-kDa subunit of bovine kidney vacuolar H<sup>+</sup>-ATPase. *Proc. natn. Acad. Sci. U.S.A.* **85**, 3004–3008.
- JOHNSON, R. G. (1988). Accumulation of biological amines into chromaffin granules: a model for hormone and neurotransmitter transport. *Physiol. Rev.* **68**, 232–307.
- KISH, P. E., FISCHER-BORENKERK, C. AND UEDA, T. (1989). Active transport of GABA and glycine into synaptic vesicles. *Proc. natn. Acad. Sci. U.S.A.* **86**, 3877–3881.
- LANGSTON, J. W., BALLARD, P., TETRUD, J. W. AND IRWIN, I. (1983). Chronic Parkinsonism in human due to a product of meperidine-analog synthesis. *Science* **219**, 574–578.
- MANDEL, M., MORIYAMA, Y., HULMES, J. D., PAN, Y. C. E., NELSON, H. AND NELSON, N. (1988). cDNA sequence encoding the 16-kDa proteolipid of chromaffin granules implies gene duplication in the evolution of H<sup>+</sup>-ATPase. *Proc. natn. Acad. Sci. U.S.A.* **85**, 5521–5524.
- MARSHALL, I. G. AND PARSONS, S. M. (1987). The vesicular acetylcholine transport system. *Trends Neurosci.* **10**, 174–177.
- MORIYAMA, Y., AMAKATSU, K., YAMADA, H., PARK, M.-Y. AND FUTAI, M. (1991a). Inhibition of neurotransmitter and hormone transport into secretory vesicles by 2-(4-phenylpiperadino)cyclohexanol and 2-bromoergocryptine: both compounds act as uncouplers and dissipate the electrochemical gradient of protons. *Archs Biochem. Biophys.* **290**, 233–238.
- MORIYAMA, Y. AND FUTAI, M. (1990a). H<sup>+</sup>-ATPase, a primary pump for accumulation of neurotransmitters, is a major constituent of brain synaptic vesicles. *Biochem. biophys. Res. Commun.* **173**, 443–446.
- MORIYAMA, Y., IWAMOTO, A., HANADA, H., MAEDA, M. AND FUTAI, M. (1991b). One-step purification of

- Escherichia coli* H<sup>+</sup>-ATPase (F<sub>0</sub>F<sub>1</sub>) and its reconstitution into liposomes with neurotransmitter transporters. *J. biol. Chem.* **266**, 22141–22146.
- MORIYAMA, Y., MAEDA, M. AND FUTAI, M. (1990). Energy coupling of L-glutamate transport and vacuolar H<sup>+</sup>-ATPase in brain synaptic vesicles. *J. Biochem., Tokyo* **108**, 689–693.
- MORIYAMA, Y. AND NELSON, N. (1987a). The purified ATPase from chromaffin granule membranes is an anion-dependent proton pump. *J. biol. Chem.* **262**, 9175–9180.
- MORIYAMA, Y. AND NELSON, N. (1987b). Nucleotide binding sites and chemical modification of the chromaffin granule proton ATPase. *J. biol. Chem.* **262**, 14723–14729.
- MORIYAMA, Y. AND NELSON, N. (1989a). Cold inactivation of vacuolar proton-ATPases. *J. biol. Chem.* **264**, 3577–3582.
- MORIYAMA, Y. AND NELSON, N. (1989b). H<sup>+</sup>-translocating ATPase in Golgi apparatus: characterisation as vacuolar H<sup>+</sup> ATPase and its subunit structures. *J. biol. Chem.* **264**, 18445–18450.
- MORIYAMA, Y. AND NELSON, N. (1989c). Lysosomal H<sup>+</sup>-translocating ATPase has a similar subunit structure to chromaffin granule H<sup>+</sup>-ATPase complex. *Biochim. biophys. Acta* **980**, 241–247.
- MORIYAMA, Y. AND NELSON, N. (1990). Proton translocating ATPase from chromaffin granules and synaptic vesicles. In *Molecular Structure, Function and Assembly of the ATP Synthase* (ed. S. Marzuki), pp. 129–139. New York: Plenum Press.
- MORIYAMA, Y., YAMAMOTO, A., TASHIRO, Y. AND FUTAI, M. (1991c). Chromaffin granule H<sup>+</sup>-ATPase has F<sub>1</sub>-like structure. *FEBS Lett.* **291**, 92–96.
- NELSON, H., MANDIYAN, S., NOUMI, T., MORIYAMA, Y., MIEDEL, M. C. AND NELSON, N. (1990). Molecular cloning of cDNA encoding the C subunit of H<sup>+</sup>-ATPase from bovine chromaffin granules. *J. biol. Chem.* **265**, 20390–20393.
- NELSON, N. (1989). Structure, molecular genetics, and evolution of vacuolar H<sup>+</sup>-ATPases. *J. Bioenerg. Biomembr.* **21**, 553–572.
- NJUS, P., KELLY, P. M. AND HARNADEK, G. J. (1987). Bioenergetics of secretory vesicles. *Biochim. biophys. Acta* **853**, 237–265.
- SHORE, P. A. AND NORN, S. (1971). Failure to affect tissue reserpine concentrations by alteration of adrenergic nerve activity. *Biochem. Pharmacol.* **20**, 2133–2135.
- SUTTON, R. AND APPS, D. K. (1981). Isolation of a DCCD-binding protein from bovine chromaffin-granule membranes. *FEBS Lett.* **130**, 103–106.
- UEDA, T. (1986). Glutamate transport in the synaptic vesicles. In *Excitatory Amino Acids* (ed. P. J. Robert, J. Storm-Mathisen and H. Bradford), pp. 173–195. London: Macmillan Press.
- WANG, S.-Y., MORIYAMA, Y., MANDEL, M., HULMES, J. D., PAN, Y. C. E., DANHO, W., NELSON, H. AND NELSON, N. (1988). Cloning of cDNA encoding a 32-kDa protein: an accessory polypeptide of the H<sup>+</sup>-ATPase from chromaffin granules. *J. biol. Chem.* **263**, 17638–17642.
- XIE, X. S. AND STONE, D. K. (1986). Isolation and reconstitution of the clathrin-coated vesicles proton translocating ATPase complex. *J. biol. Chem.* **261**, 2492–2495.
- ZIMNIAK, L., DITTRICH, L., GOGARTEN, J. P., KIBAK, H. AND TAIZ, L. (1988). The cDNA sequence of the 69-kDa subunit of the carrot vacuolar H<sup>+</sup>-ATPase: homology to the  $\beta$ -chain of F<sub>0</sub>F<sub>1</sub>-ATPase. *J. biol. Chem.* **263**, 9102–9112.



## CHAPTER 5. Physiology of phagocytes and bone epithelia

|                                                                                                                                                                                                                                                                        | PAGE |
|------------------------------------------------------------------------------------------------------------------------------------------------------------------------------------------------------------------------------------------------------------------------|------|
| GRINSTEIN, S., NANDA, A., LUKACS, G. AND ROTSTEIN, O. V-ATPases in phagocytic cells.....                                                                                                                                                                               | 179  |
| CHATTERJEE, D., CHAKRABORTY, M., LEIT, M., NEFF, L., JAMSA-KELLOKUMPU, S., FUCHS, R.,<br>BARTKIEWICZ, M., HERNANDO, N. AND BARON, R. The osteoclast proton pump differs in<br>its pharmacology and catalytic subunits from other vacuolar H <sup>+</sup> -ATPases..... | 193  |
